# Supplementary material for: Photo induced reaction of myoglobins with energy transferred from excited free tryptophan
Source: Royal Society of Chemistry journal article supplement (doi:10.1039/d0ra09341f), 2020-01-01
Supplement: d0ra09341f1.pdf [file d0ra09341f1.pdf]

## Supplementary Information

### Photo Induced Reaction of Myoglobins with Energy Transferred from Excited Free Tryptophan

Hong-Yu Cao <sup>a,c\*</sup>, Yu-Qi Ma <sup>b</sup>, Ling-Xing Gao <sup>b</sup>, Qian Tang <sup>a,c</sup>, Xue-Fang Zheng <sup>b,c\*</sup>

*a* College of Life Science and Biotechnology, Dalian University, Dalian 116622, China

*b* College of Environmental and Chemical Engineering, Dalian University, Dalian 116622, China

*c* Liaoning Key Laboratory of Bio-Organic Chemistry, Dalian University, Dalian 116622, China

Table S1. The parameters of kinetic curves fitted with multiple exponents by Levenberg Marquardt equation.

| Protein               | Wavelength<br>(nm) | $\chi^2$ | $\tau$ (ns) | <i>B</i> (%) | std. Dev |
|-----------------------|--------------------|----------|-------------|--------------|----------|
| DeoxyMb               | 430                | 0.695    | 13.70       | 0.93         | 1.53     |
| MbO <sub>2</sub>      | 410                | 0.907    | 44.78       | 0.90         | 0.65     |
| MetMb                 | 405                | 0.814    | 23.09       | 0.93         | 1.40     |
| DeoxyMb+Trp           | 430                | 0.806    | 20.48       | 1.56         | 1.42     |
| MbO <sub>2</sub> +Trp | 410                | 1.450    | 17.24       | 1.39         | 0.75     |
| MetMb+Trp             | 405                | 1.330    | 18.37       | 1.73         | 1.07     |

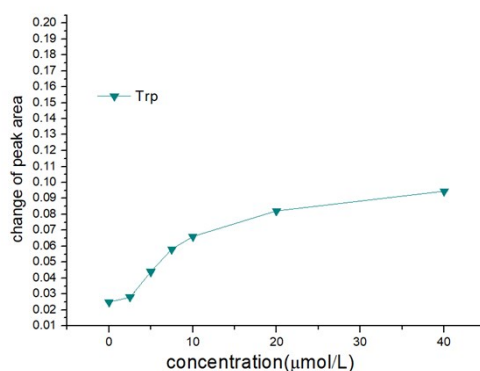

Fig. S1 The peak area changes of metMb ( $10^{-5}$ mol/L) at 544 nm after irradiation with 254 nm light in different concentration of amino acids solutions
